# Supplementary material for: Micronutrient Requirements and Sharing Capabilities of the Human Gut Microbiome
Source: PubMed Central journal article supplement (PMC6593275; doi:10.3389/fmicb.2019.01316), 2019-06-12
Supplement: Image_2.pdf [file Image_2.pdf]

(A)

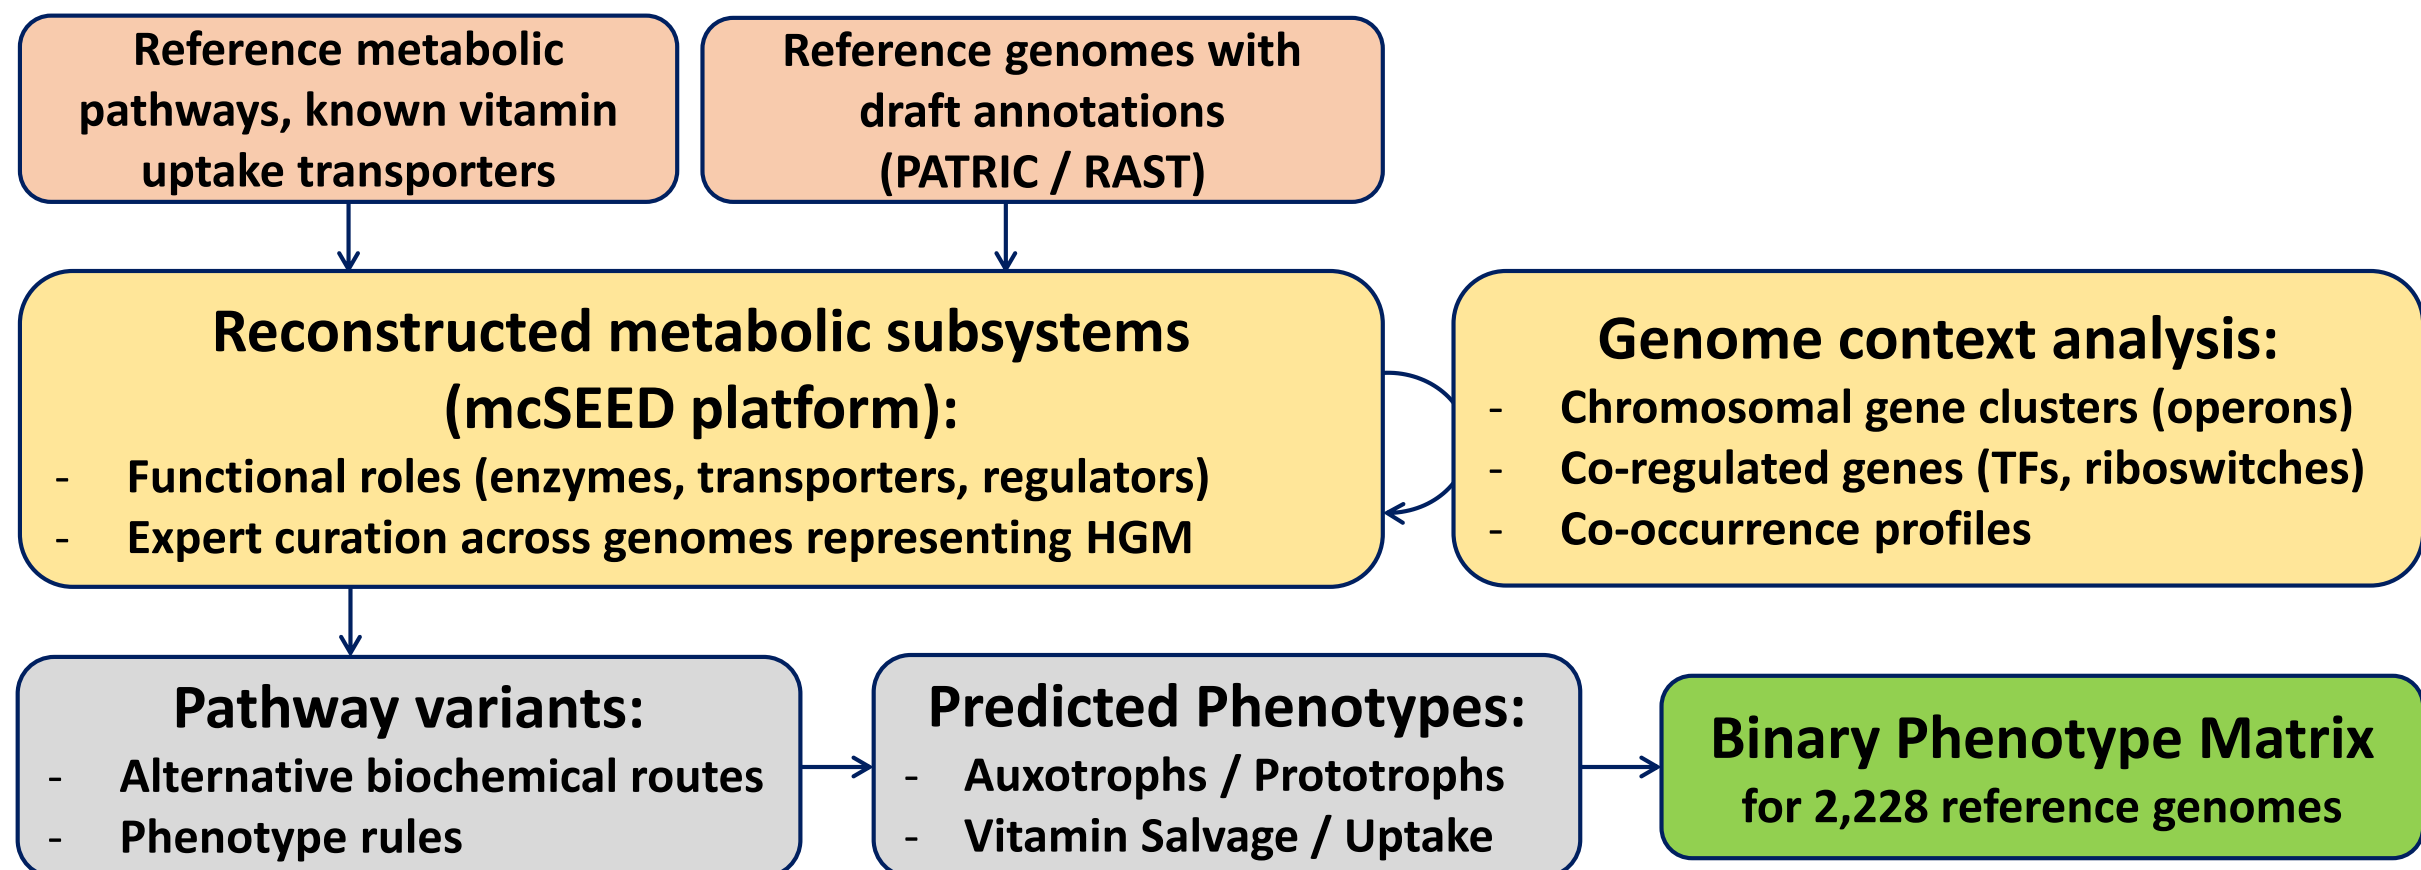

(B)

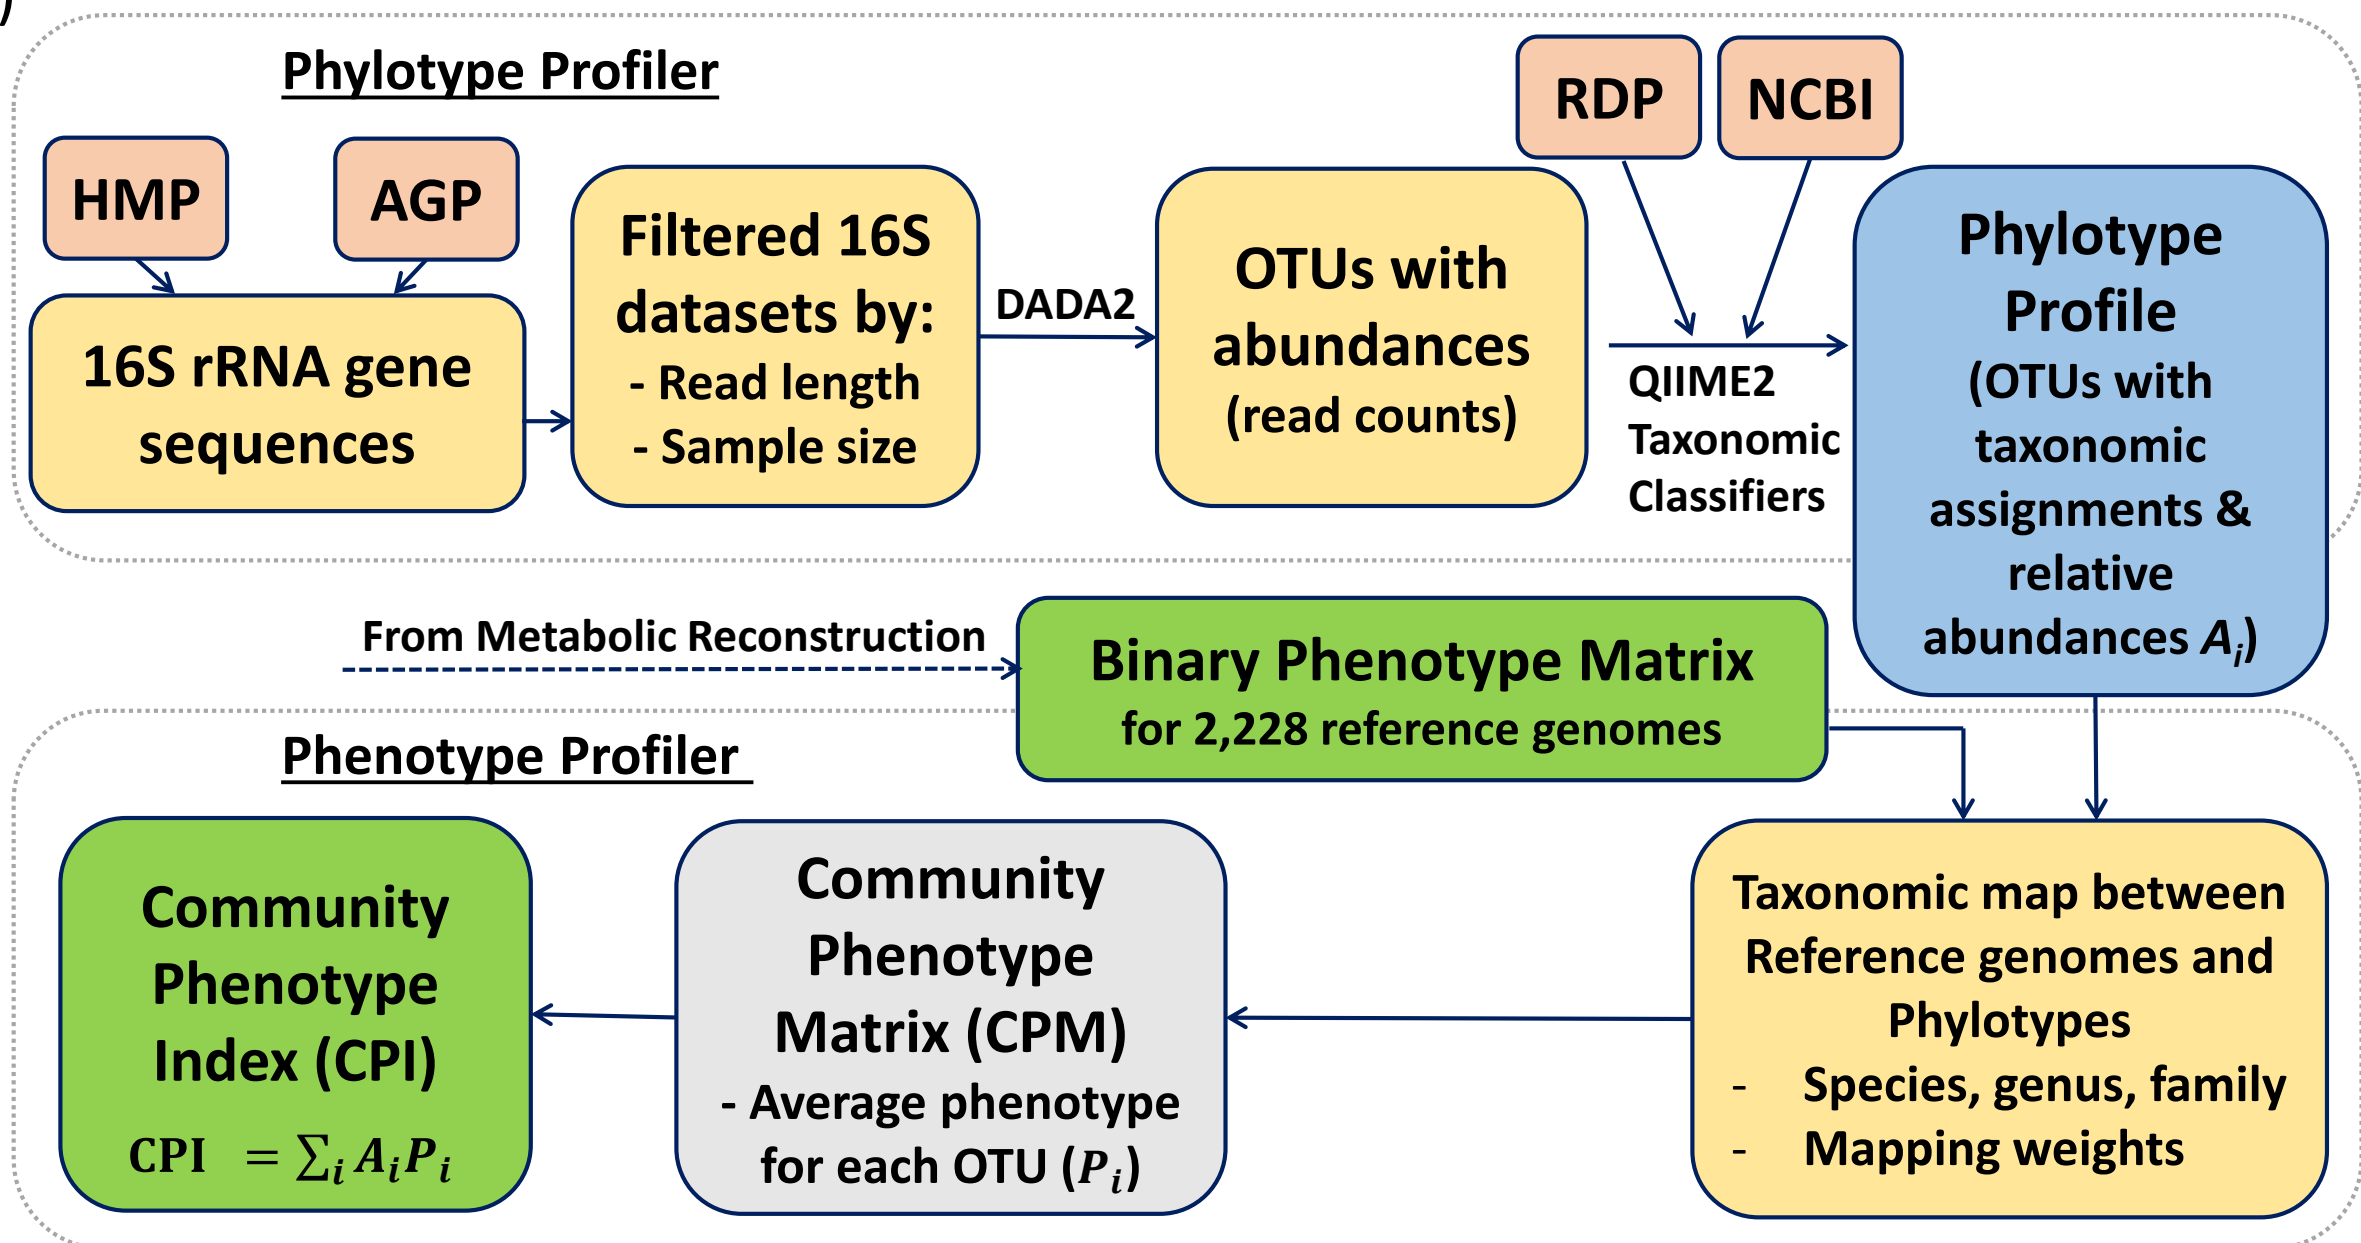

Figure S2. Workflows used for (A) comparative genomic reconstruction of metabolic pathways and phenotype assignments in reference genomes, and (B) predictive phenotype profiling of microbial communities derived from 16S samples.
