# Supplementary material for: Micronutrient Requirements and Sharing Capabilities of the Human Gut Microbiome
Source: PubMed Central journal article supplement (PMC6593275; doi:10.3389/fmicb.2019.01316), 2019-06-12
Supplement: Image_5.pdf [file Image_5.pdf]

(A) HMP (245 samples)

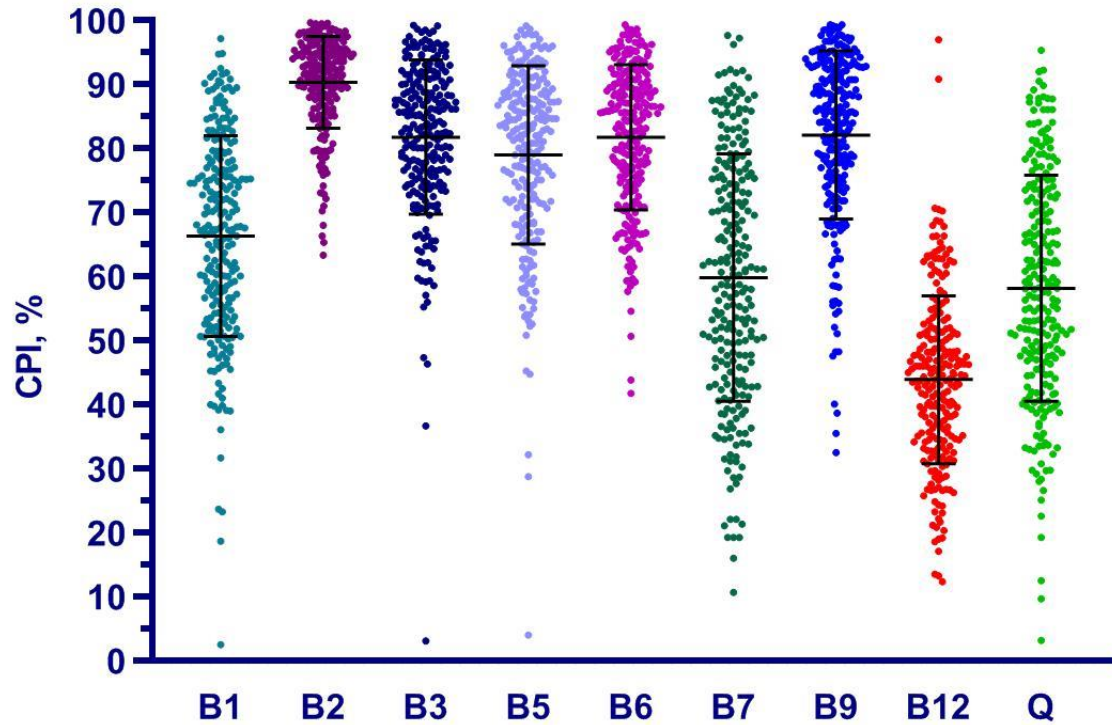

(B) AGP (2863 samples)

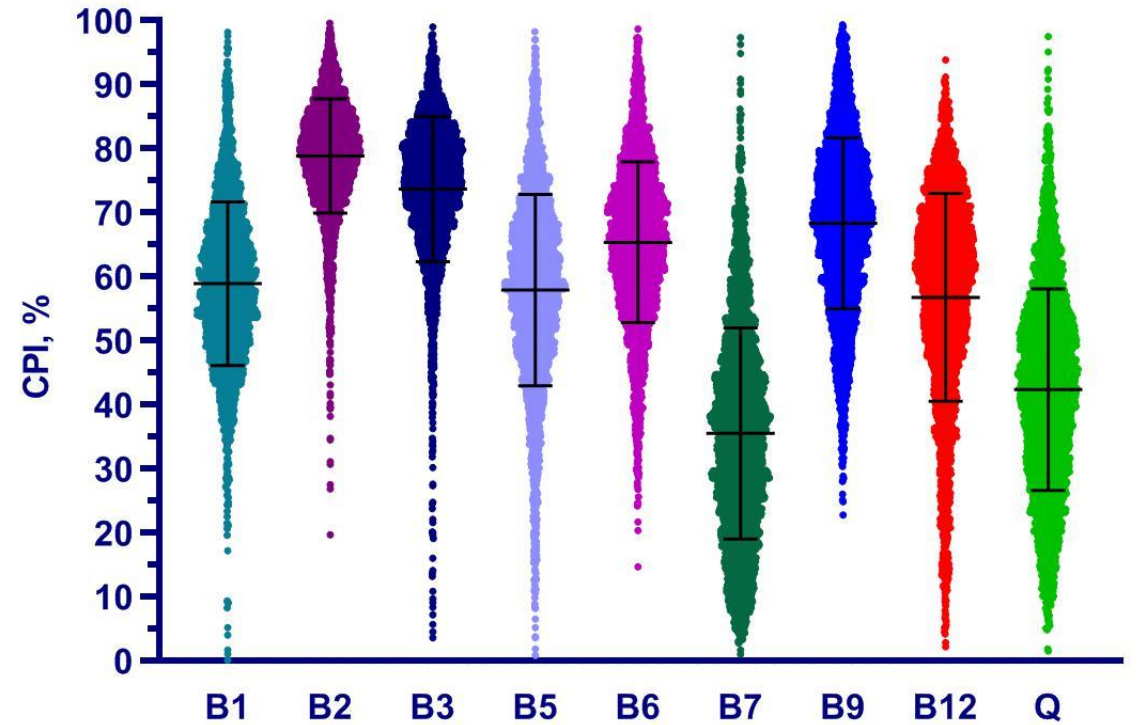

**Figure S5. Distribution of Community Phenotype Indices for B and Q vitamins in (A) HMP and (B) AGP datasets after renormalization by 16S gene count numbers.**
