# Supplementary material for: Micronutrient Requirements and Sharing Capabilities of the Human Gut Microbiome
Source: PubMed Central journal article supplement (PMC6593275; doi:10.3389/fmicb.2019.01316), 2019-06-12
Supplement: Image_6.pdf [file Image_6.pdf]

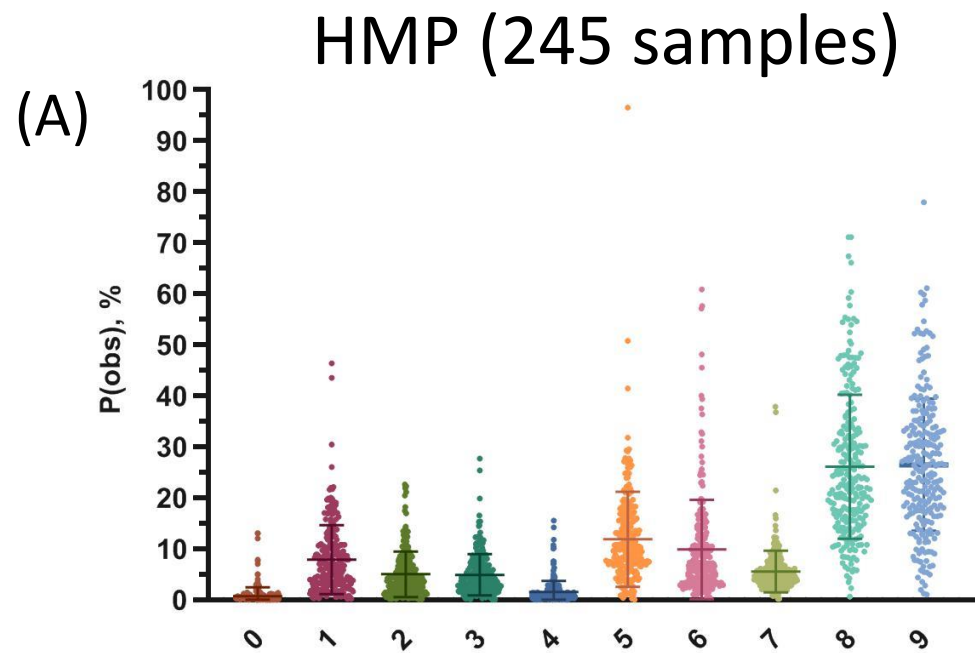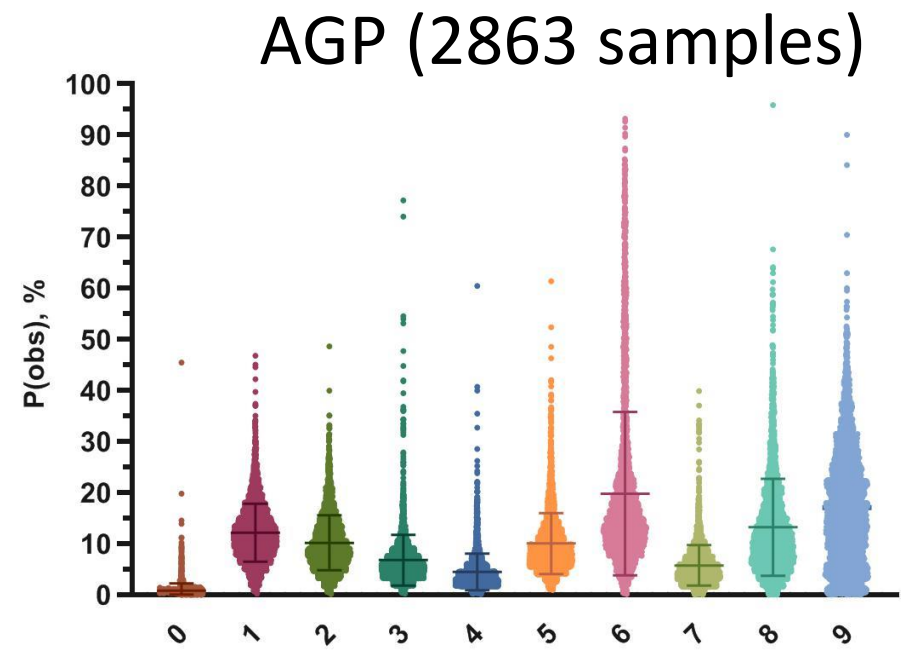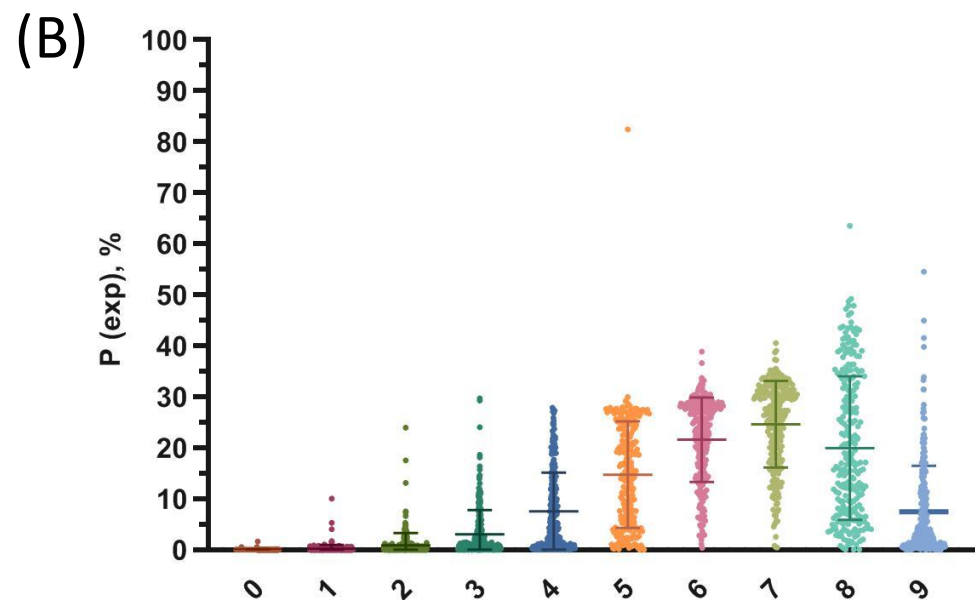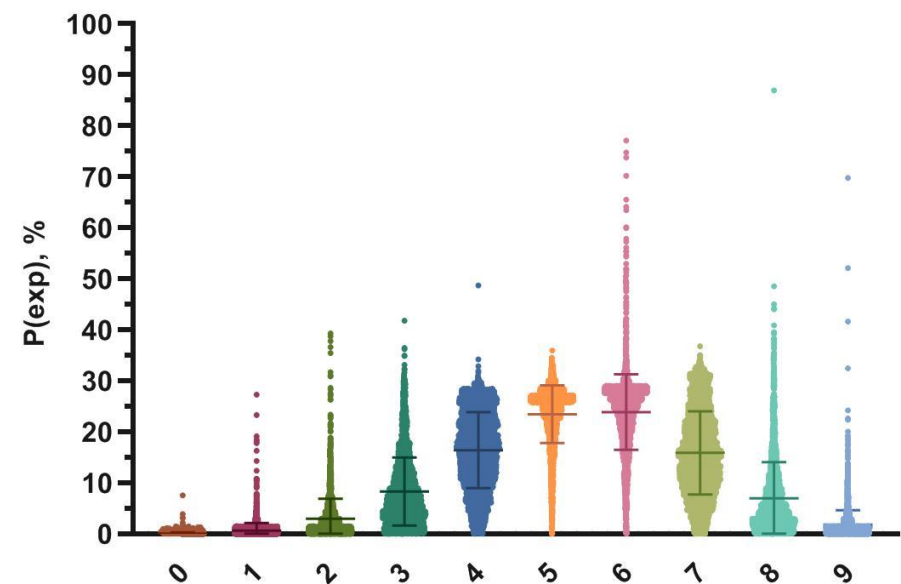

**Figure S6. Observed (A) and expected (B) probabilities for Vitamin Prototrophy Ranks (VPR) in HMP and AGP datasets.**
